# Supplementary material for: Involvement of FGFR4 Gene Variants on the Clinicopathological Severity in Urothelial Cell Carcinoma
Source: PubMed Central journal article supplement (PMC6982237; doi:10.3390/ijerph17010129), 2019-12-23
Supplement: ijerph-17-00129-s001.pdf [file ijerph-17-00129-s001.pdf]

# Involvement of FGFR4 Gene Variants on the Clinicopathological Severity in Urothelial Cell Carcinoma

Ming-Dow Tsay<sup>1,2,#</sup>, Ming-Ju Hsieh<sup>1,3,4,#</sup>, Chia-Yi Lee<sup>5,6</sup>, Shian-Shiang Wang<sup>1,7,8,9</sup>, Chuan-Shu Chen<sup>1,8</sup>, Sheng-Chun Hung<sup>1,7,8</sup>, Chia-Yen Lin<sup>1,8</sup>, Shun-Fa Yang<sup>1,10,\*</sup>

**Table 1.** Genotype distributions of Fibroblast growth factor receptor 4 (FGFR4) gene polymorphisms in 856 Controls and 272 patients had primary bladder UCC.

| Variable         | Controls (N = 856)<br>n (%) | Patients (N = 272)<br>n (%) | OR (95% CIs)         | AOR (95% CIs)       |
|------------------|-----------------------------|-----------------------------|----------------------|---------------------|
| <b>rs2011077</b> |                             |                             |                      |                     |
| TT               | 221 (25.8%)                 | 71 (26.1%)                  | 1.000 (reference)    | 1.000 (reference)   |
| TC               | 418 (48.8%)                 | 139 (51.1%)                 | 1.035 (0.745–1.438)  | 0.973 (0.621–1.525) |
| CC               | 217 (25.4%)                 | 62 (22.8%)                  | 0.889 (0.603–1.312)  | 0.815 (0.478–1.391) |
| TC+CC            | 635 (74.2%)                 | 201 (73.9%)                 | 0.985 (0.722–1.345)  | 0.919 (0.602–1.403) |
| <b>rs351855</b>  |                             |                             |                      |                     |
| GG               | 242 (28.3%)                 | 74 (27.2%)                  | 1.000 (reference)    | 1.000 (reference)   |
| GA               | 426 (49.7%)                 | 139 (51.1%)                 | 1.067 (0.772–1.474)  | 1.167 (0.751–1.815) |
| AA               | 188 (22.0%)                 | 59 (21.7%)                  | 1.026 (0.694–1.518)  | 0.983 (0.569–1.697) |
| GA+AA            | 614 (71.7%)                 | 198 (72.8%)                 | 1.055 (0.777–1.432)  | 1.111 (0.730–1.691) |
| <b>rs7708357</b> |                             |                             |                      |                     |
| GG               | 838 (97.9%)                 | 266 (97.8%)                 | 1.000 (reference)    | 1.000 (reference)   |
| GA               | 17 (2.0%)                   | 5 (1.8%)                    | 0.927 (0.339–2.535)  | 1.518 (0.463–4.975) |
| AA               | 1 (0.1%)                    | 1 (0.4%)                    | 3.150 (0.196–50.540) | ---                 |
| AG+AA            | 18 (2.1%)                   | 6 (2.2%)                    | 1.050 (0.413–2.673)  | 2.013 (0.672–6.029) |
| <b>rs1966265</b> |                             |                             |                      |                     |
| AA               | 221 (25.8%)                 | 68 (25.0%)                  | 1.000 (reference)    | 1.000 (reference)   |
| AG               | 420 (49.1%)                 | 142 (52.2%)                 | 0.937 (0.633–1.387)  | 0.861 (0.498–1.489) |
| GG               | 215 (25.1%)                 | 62 (22.8%)                  | 1.099 (0.789–1.531)  | 1.124 (0.713–1.772) |
| AG+GG            | 635 (74.2%)                 | 204 (75.0%)                 | 1.044 (0.763–1.430)  | 1.034 (0.671–1.594) |

CIs: confidence intervals; OR: odds ratio with their 95% confidence intervals were estimated by logistic regression models. AOR: adjusted odds ratio with their 95% confidence intervals were estimated by multiple logistic regression models after controlling for age, gender, and tobacco consumption.

**Table S2.** Genotype distributions of Fibroblast growth factor receptor 4 (FGFR4) gene polymorphisms in 856 Controls and 156 primary upper tract UC.

| Variable         | Controls (N = 856)<br>n (%) | Patients (N = 156)<br>n (%) | OR (95% CIs)        | AOR (95% CIs)       |
|------------------|-----------------------------|-----------------------------|---------------------|---------------------|
| <b>rs2011077</b> |                             |                             |                     |                     |
| TT               | 221 (25.8%)                 | 39 (25.0%)                  | 1.000 (reference)   | 1.000 (reference)   |
| TC               | 418 (48.8%)                 | 85 (54.5%)                  | 1.152 (0.763–1.741) | 1.113 (0.734–1.689) |
| CC               | 217 (25.4%)                 | 32 (20.5%)                  | 0.836 (0.505–1.383) | 0.821 (0.494–1.365) |
| TC+CC            | 635 (74.2%)                 | 117 (75.0%)                 | 1.044 (0.705–1.547) | 1.728 (0.901–3.314) |
| <b>rs351855</b>  |                             |                             |                     |                     |
| GG               | 242 (28.3%)                 | 40 (25.6%)                  | 1.000 (reference)   | 1.000 (reference)   |
| GA               | 426 (49.7%)                 | 83 (53.2%)                  | 1.179 (0.783–1.774) | 1.259 (0.832–1.906) |
| AA               | 188 (22.0%)                 | 33 (21.2%)                  | 1.062 (0.645–1.749) | 1.096 (0.662–1.813) |
| GA+AA            | 614 (71.7%)                 | 116 (74.4%)                 | 1.143 (0.775–1.686) | 1.660 (0.888–3.106) |
| <b>rs7708357</b> |                             |                             |                     |                     |
| GG               | 838 (97.9%)                 | 150 (96.2%)                 | 1.000 (reference)   | 1.000 (reference)   |

|                  |             |             |                      |                     |
|------------------|-------------|-------------|----------------------|---------------------|
| GA               | 17 (2.0%)   | 5 (3.2%)    | 1.643 (0.597–4.521)  | 1.678 (0.602–4.678) |
| AA               | 1 (0.1%)    | 1 (0.6%)    | 5.587 (0.348–89.804) |                     |
| AG+AA            | 18 (2.1%)   | 6 (3.8%)    | 1.862 (0.727–4.768)  | 2.055 (0.514–8.226) |
| <b>rs1966265</b> |             |             |                      |                     |
| AA               | 221 (25.8%) | 39 (25.0%)  | 1.000 (reference)    | 1.000 (reference)   |
| AG               | 420 (49.1%) | 84 (53.8%)  | 0.870 (0.527–1.434)  | 0.851 (0.513–1.409) |
| GG               | 215 (25.1%) | 33 (21.2%)  | 1.133 (0.750–1.713)  | 1.098 (0.723–1.666) |
| AG+GG            | 635 (74.2%) | 117 (75.0%) | 1.044 (0.705–1.547)  | 1.728 (0.901–3.314) |

CIs: confidence intervals; OR: odds ratio with their 95% confidence intervals were estimated by logistic regression models. AOR: adjusted odds ratio with their 95% confidence intervals were estimated by multiple logistic regression models after controlling for age, gender, and tobacco consumption.
